# Supplementary material for: Comparison of Family History and SNPs for Predicting Risk of Complex Disease
Source: PLoS Genet. 2012 Oct 11;8(10):e1002973. doi: 10.1371/journal.pgen.1002973 (PMC3469463; doi:10.1371/journal.pgen.1002973)
Supplement: Text S1 — Additional derivations. (PDF) [file pgen.1002973.s012.pdf]

## Text S1: Additional derivations

### Derivation of proportion of individuals exceeding a given post-test risk

The probability of obtaining a risk estimate,  $R$ , of  $t$  or greater is

$$P(R > t) = 1 - \Phi\left(\frac{T - \Phi^{-1}(1 - t)\sqrt{1 - fh_L^2}}{\sqrt{fh_L^2}}\right),$$

where  $\Phi$  is the cdf of the standard normal distribution, and  $T = \Phi^{-1}(1 - K)$ . To see this, decompose the liability of an individual into measured and unmeasured components as  $X = X_M + X_U$  where  $X_M \sim \mathcal{N}(0, fh_L^2)$  and  $X_U \sim \mathcal{N}(0, 1 - fh_L^2)$ . Using the fact that the post-test risk is  $R = P(X_U > T - X_M) = 1 - \Phi\left(\frac{T - X_M}{\sqrt{1 - fh_L^2}}\right)$ , then  $P(R > t) = P(X_M > T - \Phi^{-1}(1 - t)\sqrt{1 - fh_L^2}) = 1 - \Phi\left(\frac{T - \Phi^{-1}(1 - t)\sqrt{1 - fh_L^2}}{\sqrt{fh_L^2}}\right)$ .

### Derivation of probability density function for the logarithm of the likelihood ratio

Let  $R(\theta) = \frac{e^\theta K}{e^\theta K + 1 - K}$  be the post-test risk when the logarithm of the likelihood ratio is  $\theta$ . Following the derivation above,

$$P(\log(\text{LR}) < \theta) = \Phi\left(\frac{T - \Phi^{-1}(1 - R(\theta))\sqrt{1 - fh_L^2}}{\sqrt{fh_L^2}}\right)$$

so the density function is given by

$$\begin{aligned} \rho(\theta) &= \frac{\partial}{\partial \theta} P(\log(\text{LR}) < \theta) \\ &= \phi\left(\frac{T - \Phi^{-1}(1 - R(\theta))\sqrt{1 - fh_L^2}}{\sqrt{fh_L^2}}\right) \cdot \sqrt{\frac{1 - fh_L^2}{fh_L^2}} \cdot \Phi^{-1}'(1 - R(\theta)) \cdot R'(\theta) \end{aligned}$$

where  $\phi$  is the density function for a standard normal random variable. Applying the fact that  $1 = \frac{d}{dx} x = \frac{d}{dx} \Phi(\Phi^{-1}(x)) = \Phi'(\Phi^{-1}(x))\Phi^{-1}'(x) = \phi(\Phi^{-1}(x))\Phi^{-1}'(x)$ ,

$$\begin{aligned} \rho(\theta) &= \phi\left(\frac{T - \Phi^{-1}(1 - R(\theta))\sqrt{1 - fh_L^2}}{\sqrt{fh_L^2}}\right) \cdot \sqrt{\frac{1 - fh_L^2}{fh_L^2}} \cdot \frac{1}{\phi(\Phi^{-1}(1 - R(\theta)))} \cdot \frac{e^\theta K(1 - K)}{(e^\theta K + 1 - K)^2} \\ &= \frac{e^\theta K(1 - K)}{(e^\theta K + 1 - K)^2} \sqrt{\frac{1 - fh_L^2}{fh_L^2}} \cdot e^z \end{aligned}$$

where

$$z = -\frac{1}{2}(\Phi^{-1}(1 - R(\theta)))^2 - \frac{\left(T - \Phi^{-1}(1 - R(\theta))\sqrt{1 - fh_L^2}\right)^2}{2fh_L^2}.$$

### Including covariates in the liability-threshold model

In the main text, we discussed various approaches to handling sex-dependence of phenotypes. Here, we describe an approach which explicitly models sex as a covariate in the model. We note that this approach extends easily to arbitrary discrete covariates.

Consider a modified liability threshold model in which an individual's disease liability is decomposed into additive genetic, environmental, and sex contributions,  $X_i = G_i + E_i + S_i$ . As before, we assume that  $G_1, \dots, G_m$  are sampled from a multivariate normal distribution with zero mean and covariance matrix  $h_L^2 C$ .

This time, however, we additionally model sex contributions to liability for each individual in the pedigree as being independently sampled from a Bernoulli distribution. Notationally, we refer to the two outcomes of the Bernoulli distribution as  $s_1$  and  $s_2$  and their corresponding probabilities as  $p_1$  and  $p_2$  (where  $p_1 + p_2 = 1$ ); without loss of generality, we assume that  $\sum_j p_j s_j = 0$ . Letting  $h_S^2$  denote the total variance in liability arising from sex effects, and assuming that  $E_1, \dots, E_m$  are each independently sampled from a zero-mean normal distribution with variance  $1 - h_L^2 - h_S^2$ , it follows that  $E[X_i] = E[G_i] + E[E_i] + E[S_i] = 0$  and  $\text{Var}[X_i] = \text{Var}[G_i] + \text{Var}[E_i] + \text{Var}[S_i] = h_L^2 + (1 - h_L^2 - h_S^2) + h_S^2 = 1$ .

Let  $K_1$  and  $K_2$  denote the sex-specific disease frequencies for males and females, respectively. The liability contributions  $s_j$  for each sex can be determined from the sex-specific frequencies  $K_j$  by noting that within any sex stratum, the genetic and environmental contributions to liability are normally distributed, i.e.,  $X|S = s_j \sim \mathcal{N}(s_j, 1 - h_S^2)$ . If  $T$  denotes the threshold on total liability beyond which the disease manifests, then  $\frac{T - s_j}{\sqrt{1 - h_S^2}} = \Phi^{-1}(1 - K_j)$  in order for the proportion of cases in the  $j$ th stratum to be  $K_j$ . Solving for  $s_j$ , we have  $s_j = T - \Phi^{-1}(1 - K_j)\sqrt{1 - h_S^2}$ . To find  $T$  and  $h_S^2$ , observe that

$$\begin{aligned} 0 &= \sum_j p_j s_j = \sum_j p_j \left[ T - \Phi^{-1}(1 - K_j)\sqrt{1 - h_S^2} \right] \\ h_S^2 &= \sum_j p_j s_j^2 = \sum_j p_j \left[ T - \Phi^{-1}(1 - K_j)\sqrt{1 - h_S^2} \right]^2. \end{aligned}$$

From the first equation, it follows that  $T = \sum_j p_j \Phi^{-1}(1 - K_j)\sqrt{1 - h_S^2}$ . Substituting into the second equation,

$$\begin{aligned} h_S^2 &= \sum_j p_j \left[ \left( \sum_{j'} p_{j'} \Phi^{-1}(1 - K_{j'}) - \Phi^{-1}(1 - K_j) \right) \sqrt{1 - h_S^2} \right]^2 \\ &= (1 - h_S^2) \left[ \sum_j p_j \left( \sum_{j'} p_{j'} \Phi^{-1}(1 - K_{j'}) - \Phi^{-1}(1 - K_j) \right)^2 \right] \\ &= (1 - h_S^2) \left[ \left( \sum_j p_j (\Phi^{-1}(1 - K_j))^2 \right) - \left( \sum_j p_j \Phi^{-1}(1 - K_j) \right)^2 \right] \\ &= (1 - h_S^2) \text{Var} [\Phi^{-1}(1 - K_j)]. \end{aligned}$$

Letting  $z = \text{Var} [\Phi^{-1}(1 - K_j)]$ , it follows that  $h_S^2 = \frac{z}{1+z}$ ; values for  $T$  and each of the  $s_j$  follow immediately.

Evaluating the performance of a family history-based classifier that accounts for sex can be done in a manner analogous to what has been described already; we simply modify all estimates of disease risk  $P(D_1|D_2, \dots, D_m)$  by conditioning on the known sex of each individual in the pedigree, i.e.,  $P(D_1|D_2, \dots, D_m, S_1 = s_1, \dots, S_m = s_m)$ .
